# Supplementary material for: Evolution of mobility, pain/discomfort, self-care, and mental health in patients with alpha-mannosidosis: an international caregiver and patient survey
Source: Springer Nature journal article supplement (doi:10.1186/s13023-025-03694-4), 2025-05-07
Supplement: MOESM8 [file 13023_2025_3694_MOESM8_ESM.pdf]

# Evolution of mobility, pain/discomfort, self-care, and mental health in patients with alpha-mannosidosis: an international caregiver and patient survey

Supplemental information to Stepien et al. *Orphanet Journal of Rare Diseases*. 2025

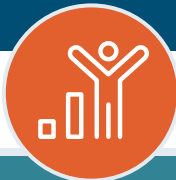

This is a plain language summary of an article about the evolution of the burden of illness and quality of life (QoL) experienced by patients with alpha-mannosidosis, which was published in *Orphanet Journal of Rare Diseases* in 2025.

## What is alpha-mannosidosis?

Alpha-mannosidosis (AM) is an extremely rare, inherited condition in which the enzyme called **alpha-mannosidase** does not work properly or is missing. This enzyme is responsible for helping clear waste from the cells in our body. Without this enzyme, **oligosaccharides** (complex nutrients that provide the body with energy) build up in the cells, which can make it harder for them to function properly. People with AM can experience a variety of symptoms that affect different organs, and these can become more severe over time.

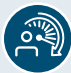

## Why was the study done?

As an ultra-rare disease, there's not much known about how alpha-mannosidosis affects people over time. To learn more, an international survey was conducted with patients and their caregivers. The goal was to better understand how the disease impacts their lives and quality of life (QoL) by comparing their experiences from five years ago to now.

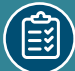

## What type of questions were included in the survey?

The people who took part in the survey answered both multiple-choice and open-ended questions. They also rated different aspects of life for someone with alpha-mannosidosis using a **Visual Analog Scale (VAS)**. This included ratings on how well they could walk, how much pain or discomfort they felt, their ability to take care of themselves, and their mental health. Comparing the scores from now and five years ago helps show which areas have gotten worse, stayed the same, or improved over the years.

**What is a VAS?** VAS is a measurement tool where participants mark the intensity of a feeling from none to maximum.

No problem walking about 0 1 2 3 4 5 6 7 8 9 10 Unable to walk about

Now

5 years ago

Example of a Visual Analog Scale (VAS)

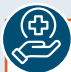

## What treatments are available for patients with alpha-mannosidosis?

There are few treatments for AM, with some patients only receiving supportive care and management of symptoms as they appear. The two main options are:

1. **Hematopoietic stem cell transplantation (HSCT)** Replaces diseased bone marrow with healthy cells that produce the missing enzyme.
2. **Enzyme replacement therapy (ERT)** Replaces or supplements the missing or impaired enzyme.

## Who took part?

51 people from 18 countries completed the survey

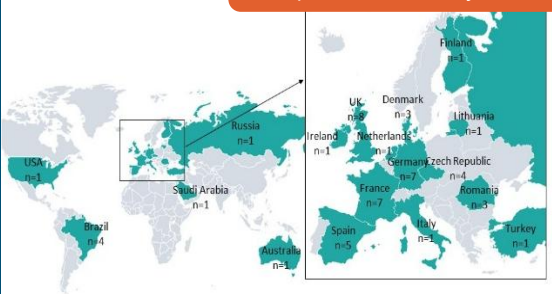

Respondents were mostly parents. Three adults with alpha-mannosidosis also took the survey.

## About the individuals with alpha-mannosidosis in this study

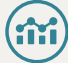

Information was collected for **51 children and adults with alpha-mannosidosis**

26 male

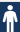

25 female

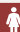

12 children  
(10–16 years old)

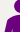

39 adults  
(16–46 years old)

26 people  
Receiving ERT

6 children 20 adults

Average age at first symptoms: 3 years

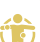

Average age at diagnosis: 8 years

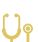

Average age ERT started: 19 years

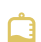

Average age now 25 years old

7 people  
Received HSCT

4 children 3 adults

Average age at first symptoms: 2 years

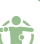

Average age at diagnosis: 4 years

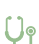

Average age they received HSCT: 4 years

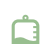

Average age now 16 years old

18 people  
Not treated

2 children 16 adults

Average age at first symptoms: 6 years

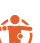

Average age at diagnosis: 11 years

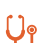

Average age now 26 years old

## About the survey

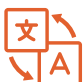

Translated into 13 languages

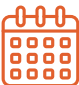

Completed online between November 2022 & February 2023

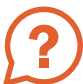

The survey asked patients and caregivers about:

- the **impact of living with alpha-mannosidosis**
- how their **overall health and daily lives** had changed **now compared with 5 years ago**

# What do these results mean for patients?

Alpha-mannosidosis is a disease that gets worse over time, a key aim is to slow down and stabilize its progression and to stabilize or improve the patients' everyday lives.

Patients treated with HSCT or ERT reported less decline on all the areas investigated compared with those who did not get any treatment. However, patients were very variable in their responses, no matter if they had received treatment or not. This shows the variability of the symptoms and the disease.

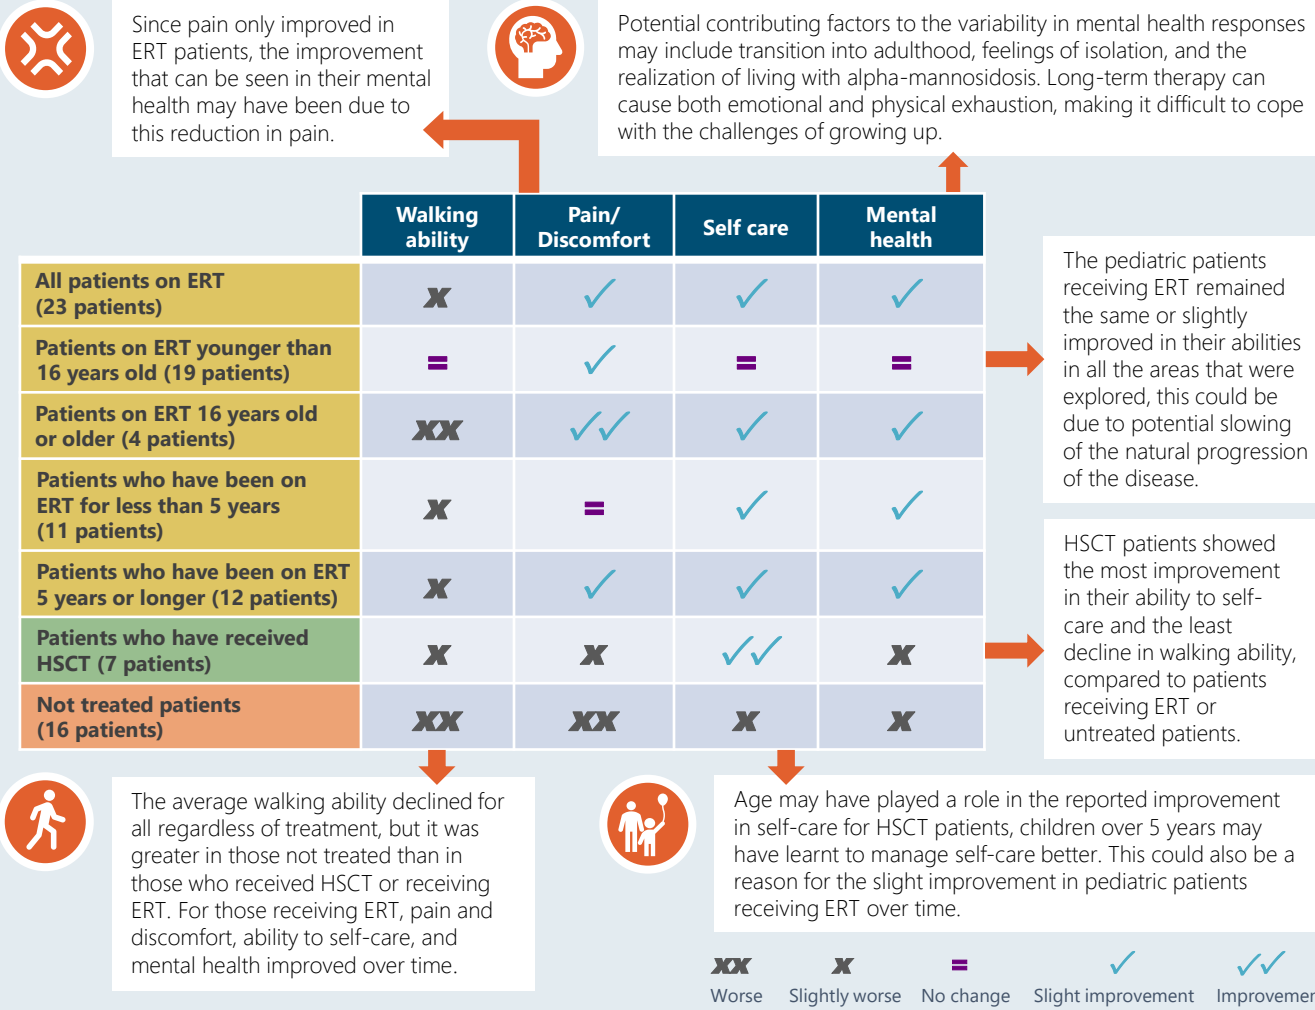

\*Classifications based on the differences in VAS scores now compared to 5 years before, scores under 1 are classified as slight change

## What did this study tell us and why is it important?

1. The results offer valuable insights into how alpha-mannosidosis progresses from the patients' perspective and its impact on their quality of life.
2. Patients who received treatment with ERT or HSCT had a different progression of the disease over time compared to those who only received supportive care and management of symptoms as they appeared.
3. The findings suggest that starting treatment early may help slow down the progression of the disease.
4. This study helps us understand the natural course of the disease and can guide future research. It also highlights the needs of patients and caregivers, ensuring better care options.

**Points to consider:** Although this study achieved a good overall response rate for a rare disease, the data should be interpreted with caution. The small sample size restricted the analyses and impacted the ability to make firm conclusions beyond descriptive trends.

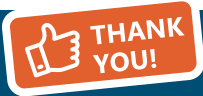

The researchers would like to thank patients and caregivers for their time to participate in the survey and for sharing their experience with us to support this project to understand the progression of alpha-mannosidosis.

This summary was produced by Rare Disease Research Partners on behalf of Chiesi Farmaceutici S.p.A.
